# Supplementary material
Source: PubMed Central journal article supplement (PMC4284543)
Supplement: pnas.201321892SI.pdf [file pnas.201321892SI.pdf]

# Supporting Information

Green et al. 10.1073/pnas.1321892112

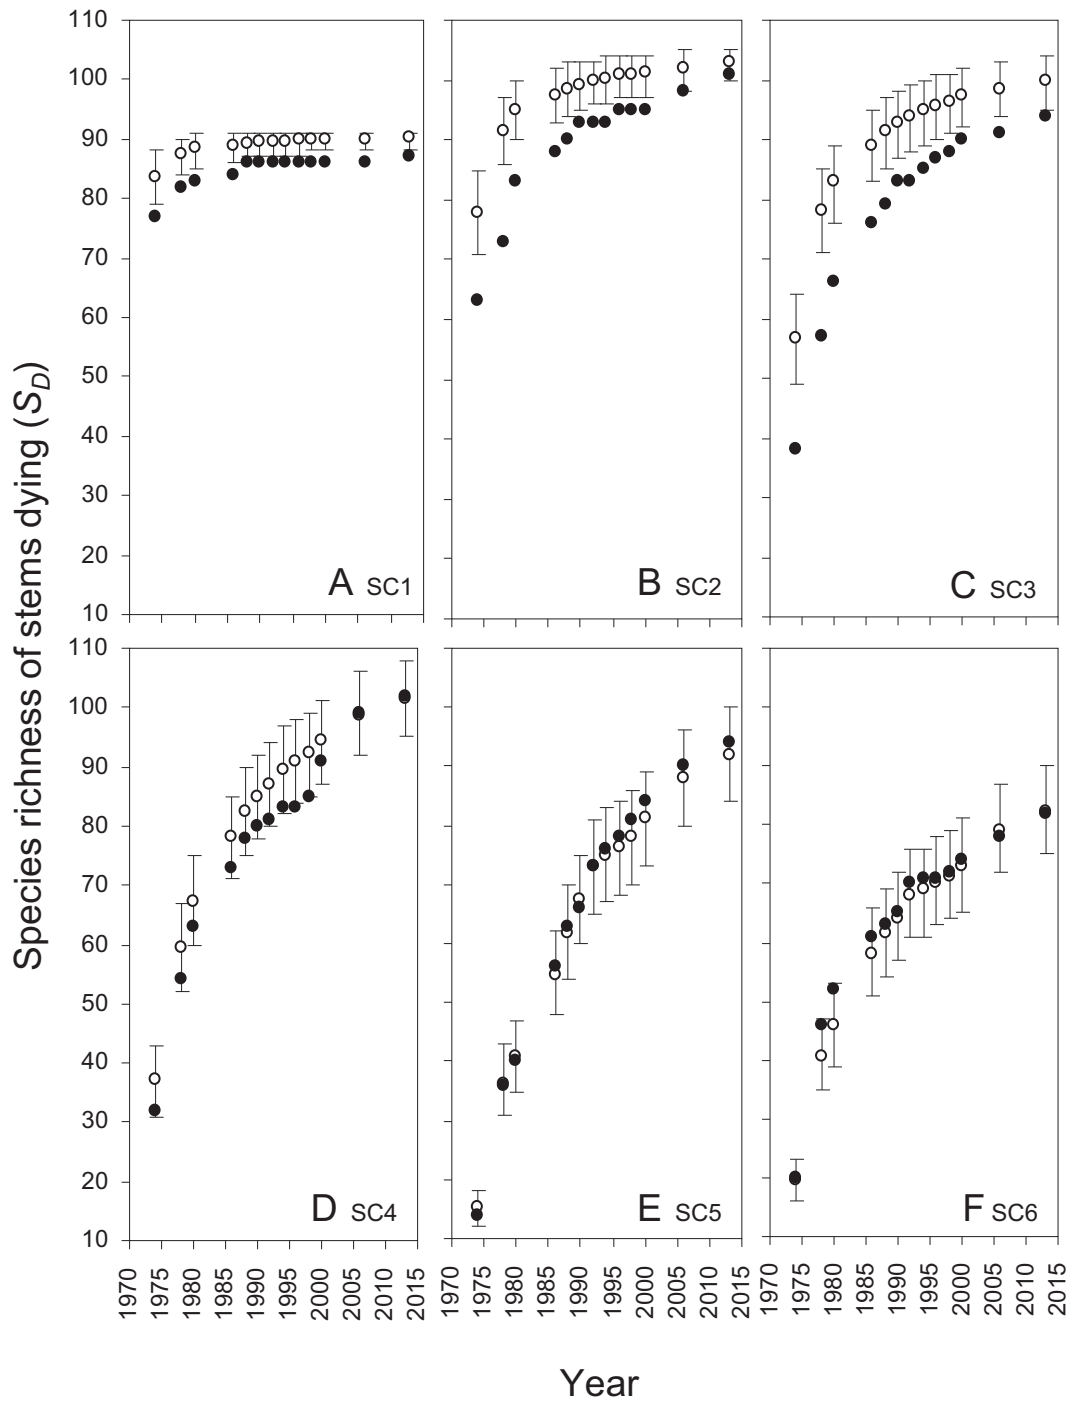

**Fig. S1.** Observed (solid circles) and mean expected (open circles) species richness of stems in six size classes (SC1, SC2, etc.) dying between 1971 and each of 13 mortality censuses thereafter to 2013. Mean expected species richness is plotted with 95% confidence intervals, based on 10,000 randomizations. The observed species richness of dying stems was significantly different to mean expected richness if observed richness fell outside these limits. Each panel (A–F) displays one size class.
